# Supplementary material
Source: PubMed Central journal article supplement (PMC3024806)

## SUPPLEMENTAL INFORMATION

### Regulation of cancer metastasis by a p27<sup>kip1</sup>-binding protein, p27RF-Rho

Daisuke Hoshino, Naohiko Koshikawa and Motoharu Seiki

#### Supplemental figure legends

##### **Figure S1. p27RF-Rho is required for cell spreading.**

Impaired cell spreading in p27RF-Rho- (sh-p27RF1,2) or RhoA-depleted (sh-RhoA1) B16F10 cell lines. Cells were plated on fibronectin-coated dish for 30 min, then fixed and stained for actin (red) or DNA (blue). Scale bars, 50  $\mu$ m.

##### **Figure S2. p27RF-Rho modulates cell morphology**

(A) We analyzed B16F10 cells of which round cell morphology is reported to be kept by active Rho/ROCK signalling and its inhibition deforms the cell shape and induces elongated shape. Indeed, the cells showed a typical round morphology when cultured on matrigel/collagen 3D culture (shLacZ), and treatment of the cells with Y27632 reproduced the reported morphology with elongates (shLacZ + Y27632). Knockdown of endogenous p27RF-Rho by expressing shRNA induced morphological change similar to the treatment of the cells with Y27632 (shp27RF-1). Actin was visualized with Alexa488-phalloidin (green). Confocal images were taken using 20 x objective lens. (B) Quantification of cell morphology in Fig S2A.

Fig S1

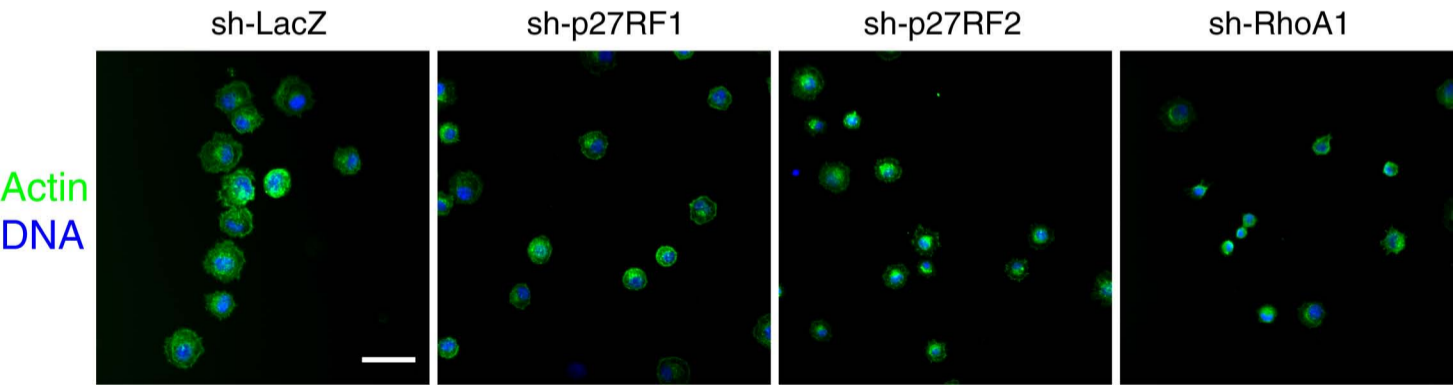

Figure S2

A

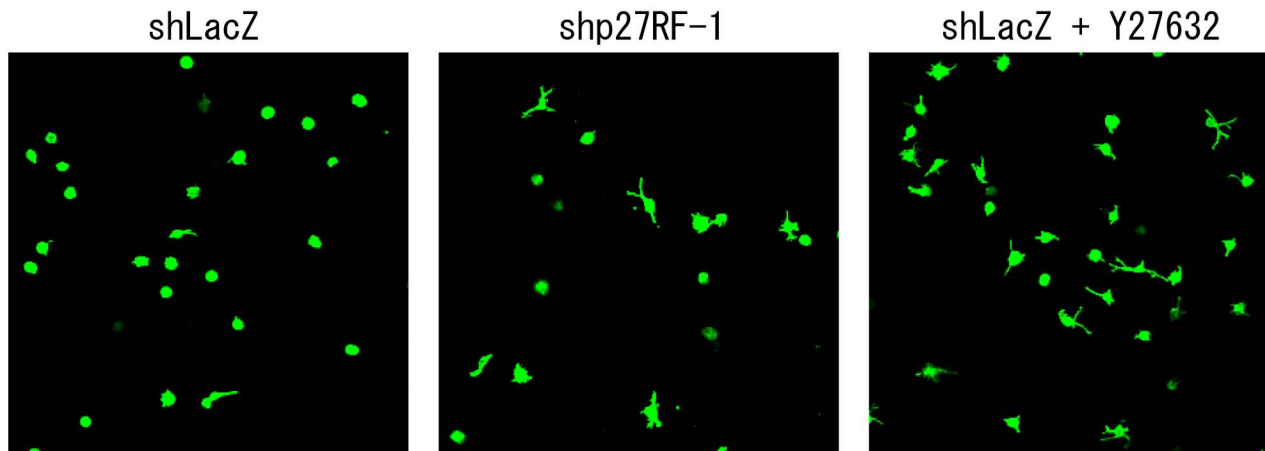

B

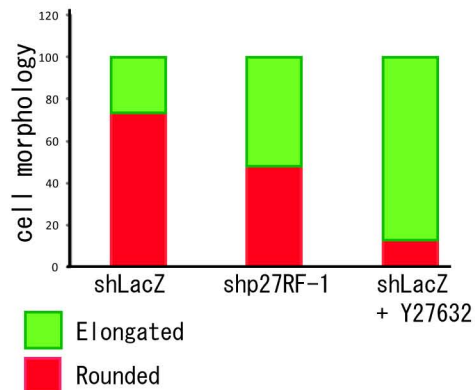

Supplement: supp_M110.159715_jbc.M110.159715-1.pdf [file supp_M110.159715_jbc.M110.159715-1.pdf]
